# Supplementary material for: Cd(ii) removal by Fe(ii) surface chemically modified layered double hydroxide–graphene oxide: performance and mechanism
Source: Royal Society of Chemistry journal article supplement (doi:10.1039/c9ra07305a), 2019-01-01
Supplement: c9ra07305a1.pdf [file c9ra07305a1.pdf]

**Cd(II) removal by Fe(II) surface chemical modification Layered double  
hydroxides-Graphene oxide: Performance and mechanism**

Wei Liao, He Wang, Hui-qiang Li\*, Ping Yang

College of Architecture and Environment, Sichuan University, Chengdu 610065,  
China.

E-mail: [Lwei0314@163.com](mailto:Lwei0314@163.com), [wh\\_820@163.com](mailto:wh_820@163.com), [lhq\\_scu@163.com](mailto:lhq_scu@163.com),  
[yping63@163.com](mailto:yping63@163.com)

Tel. +8618200288011, +8618011446490, +8618980668020, +8618602804508

\* Author to whom correspondence should be addressed; E-mail: [lhq\\_scu@163.com](mailto:lhq_scu@163.com)

Tel. +8618980668020

Preparation of GO: A suspension containing graphite powder (1.0 g),  $\text{NaNO}_3$  (1.0 g) and concentrated  $\text{H}_2\text{SO}_4$  (40 mL) was stirred in an ice bath for 2 h. Then,  $\text{KMnO}_4$  (6 g) was slowly added and stirred for 30 min. This suspension was then transferred to a 35 °C water bath and stirred for a further 2 h. To it, double-distilled water (80 mL) was added and stirred for 30 min at 98 °C.  $\text{H}_2\text{O}_2$  (20 mL) was added slowly and the mixture stirred for 1 h. Another 150 mL of double distilled water was then added to the mixture, with constant stirring for 1 h at 25 °C. The precipitate was filter and rinsed many times with double-distilled water. The precipitate was then dried in a vacuum oven at 65 °C for 48 h to obtain GO.

Spectrophotometric method for Cd(II) measurement: Transfer a certain amount of Cd(II)-containing solution to a 25 mL volumetric flask, add 5 mL buffer solution with a pH of 9.0, 5 mL 10% (V/V) OP, 1 mL 1.0 g/L PAN ethanol solution, mix and bring to volume by distilled water. The absorption of the complex compound of cadmium is measured at 555 nm after standing for 1 h.

List of Figures.

Fig.S1 The XRD patterns of the obtained samples.

Fig.S2 The SEM of (a) H-LDH-GO; (b) LDH-GO@Fe(II)<sub>10</sub>; (c) LDH-GO@Fe(II)<sub>50</sub> and EDS of (d) H-LDH-GO; (e) LDH-GO@Fe(II)<sub>10</sub>; (f) LDH-GO@Fe(II)<sub>50</sub>.

Fig.S3. The SEM of (a) H-LDH-GO and (b) LDH-GO@Fe( II )<sub>10</sub>; and EDS of (c) H-LDH-GO and (d) LDH-GO@Fe( II )<sub>10</sub> after adsorption of Cd(II).

Fig.S4 (a) Cd 3d and (b) Fe 2p XPS spectra of the samples after removal of Cd(II).

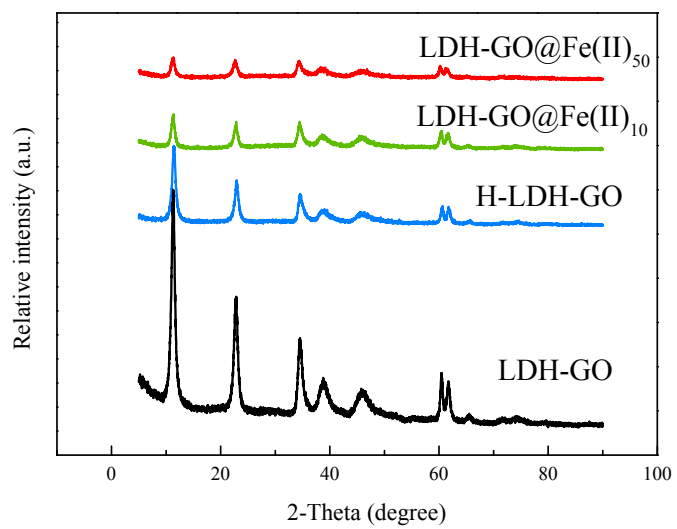

Fig.S1 The XRD patterns of the obtained samples.

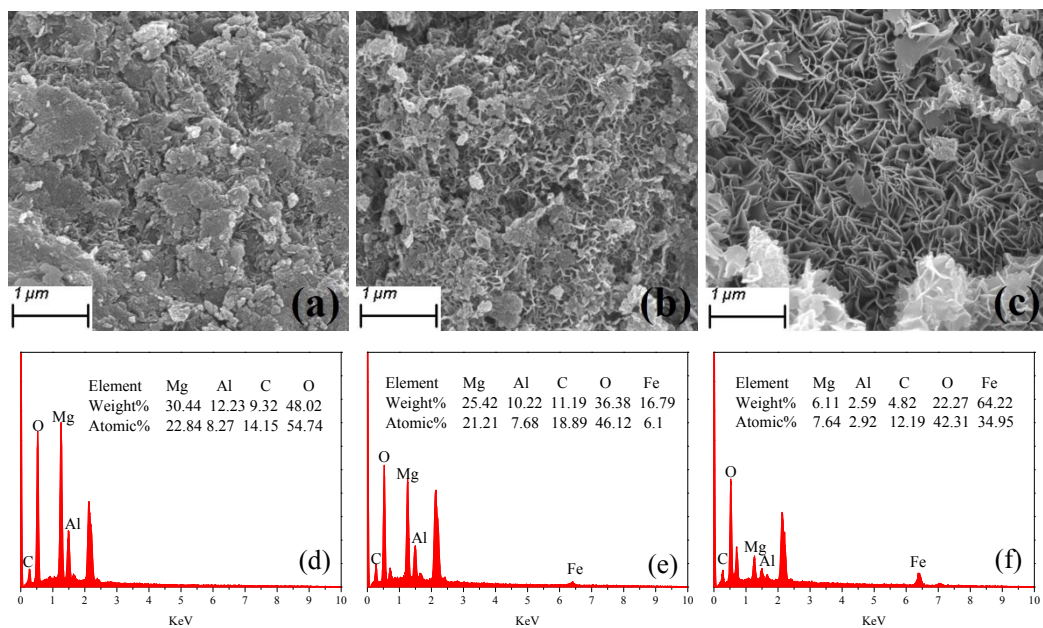

Fig.S2 The SEM of (a) H-LDH-GO; (b) LDH-GO@Fe(II)<sub>10</sub>; (c) LDH-GO@Fe(II)<sub>50</sub> and EDS of (d) H-LDH-GO; (e) LDH-GO@Fe(II)<sub>10</sub>; (f) LDH-GO@Fe(II)<sub>50</sub>.

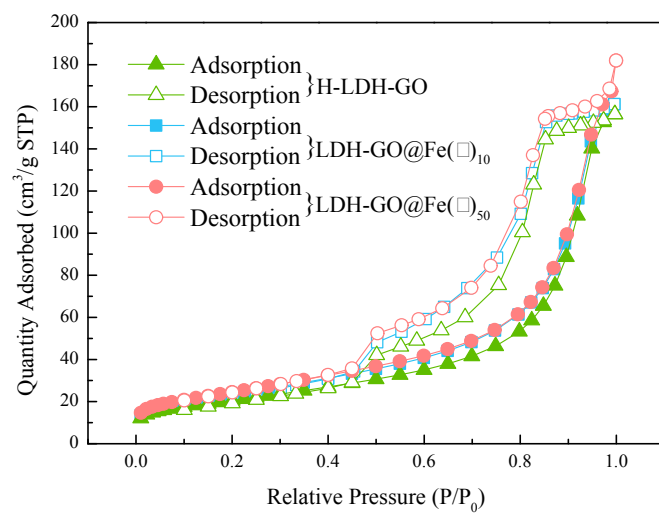

Fig.S3 Isotherm curve of N<sub>2</sub> adsorption–desorption

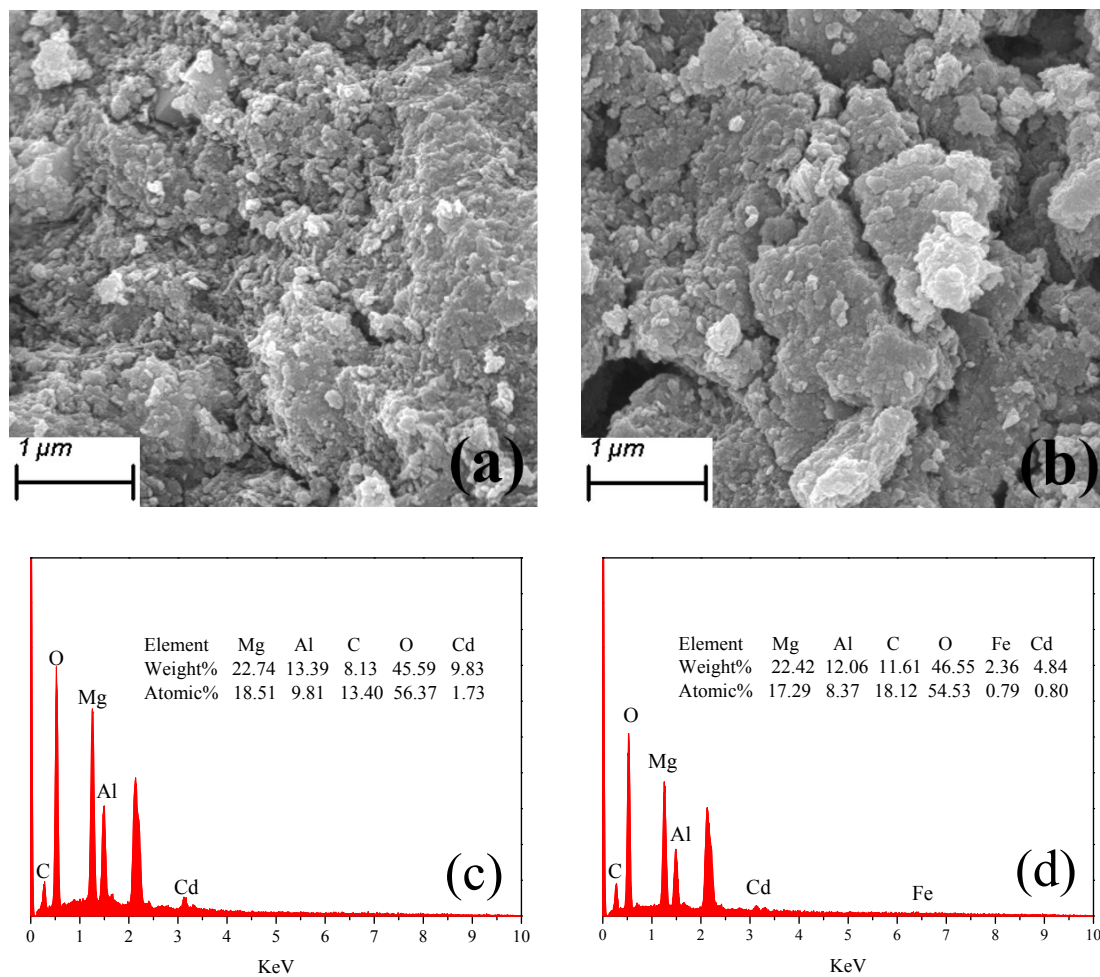

Fig.S3. The SEM of (a) H-LDH-GO and (b) LDH-GO@Fe(II)<sub>10</sub>; and EDS of (c) H-LDH-GO and (d) LDH-GO@Fe(II)<sub>10</sub> after adsorption of Cd(II).

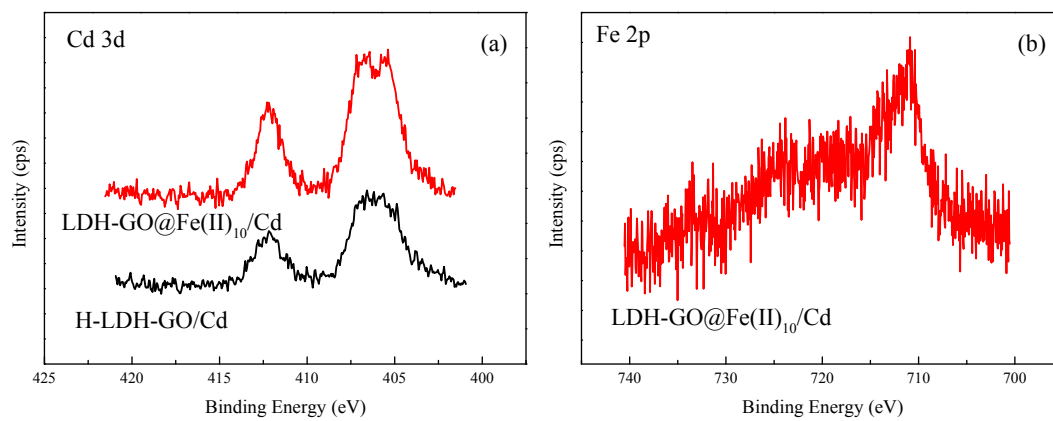

Fig.S4 (a) Cd 3d and (b) Fe 2p XPS spectra of the samples after removal of Cd(II).
